# Supplementary material
Source: HighWire-hosted journal article supplement (https://heart.bmj.com/content/109/17/1286)

## Supplementary materials

**Figure S1.** Days with brady- and tachyarrhythmia episodes and management strategy in patients with both episode types (n=22). Patient #9 had nocturnal bradyarrhythmias only, and patient #11 had tachycardia with prolonged conversion pauses and underwent an ablation procedure. Note that only a few (5 out of 22, 22%) patients underwent a pulmonary vein ablation and/or a cavotricuspid isthmus ablation.

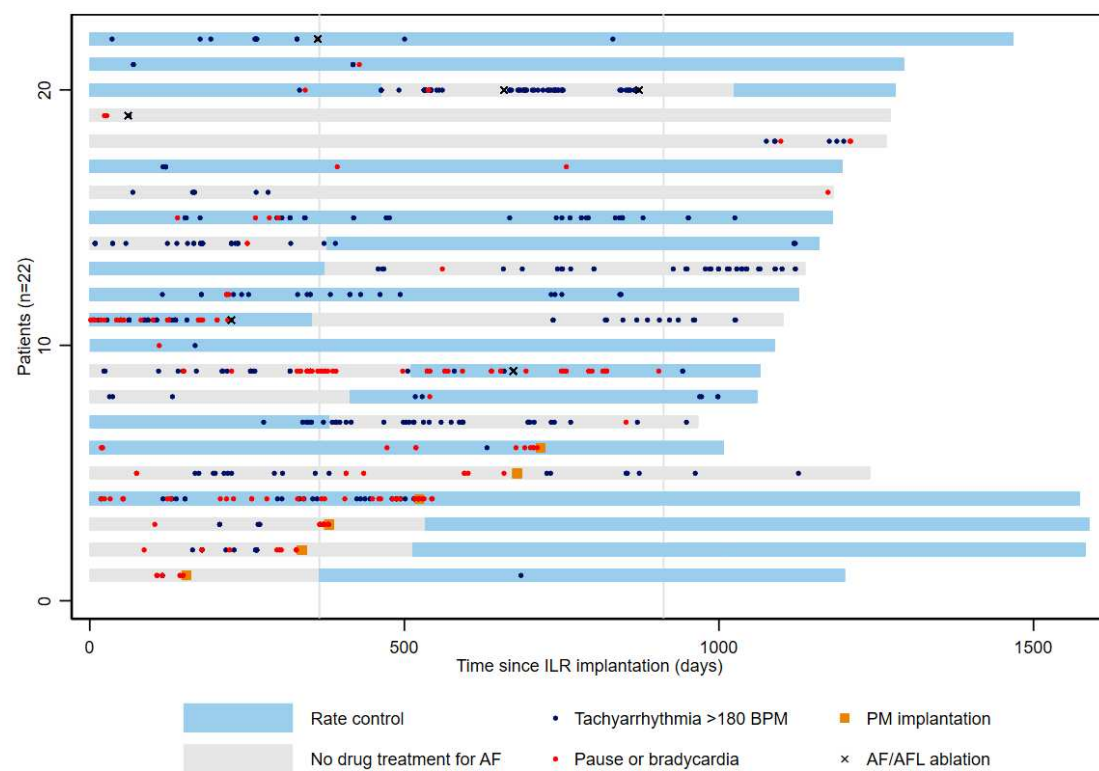

**Figure S2.** Days with tachyarrhythmia episodes over follow-up (n=106 patients). Note that 24 of 106 patients (23%) underwent pulmonary vein isolation or a cavotricuspid isthmus ablation.

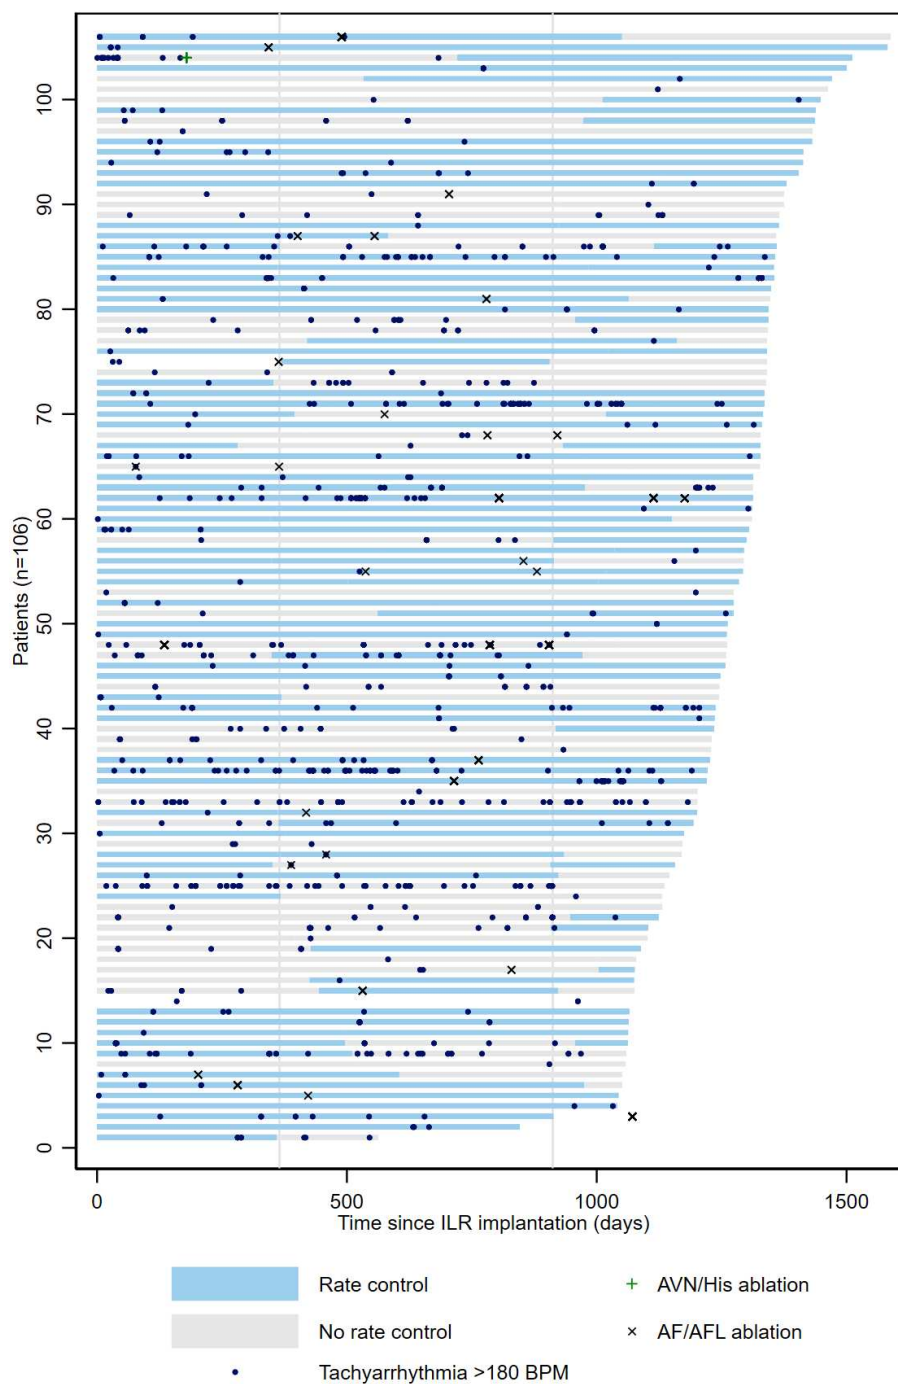

**Figure S3.** Two episodes of physiological aberrancy commonly seen with atrial fibrillation (Ashman phenomenon).

Wide QRS complexes follow a short R-R interval preceded by a long R-R interval.

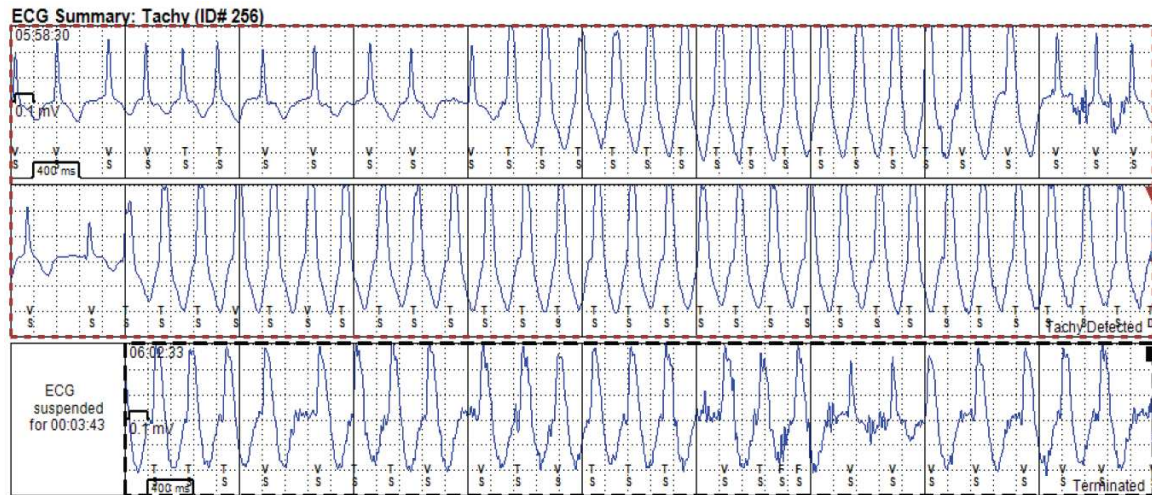

**Figure S4a.** Examples of nocturnal episodes in one day (24 hour-strips) in five different patients. The majority comprised bradycardia  $\leq 30$  BPM or pauses  $\geq 5$  seconds.

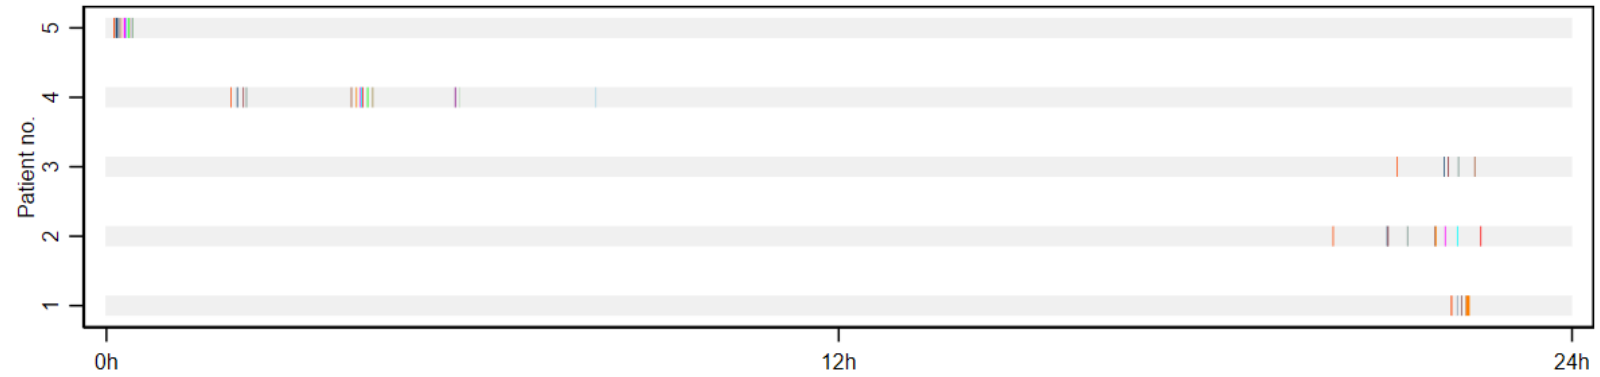

**Figure S4b.** Examples of consecutive tachyarrhythmia episodes in one day (24 hour-strips) in five different patients. Bar width indicates episode duration (relative over 24 hours), and placement indicates timing during the day. Most tachyarrhythmias occurred during daytime.

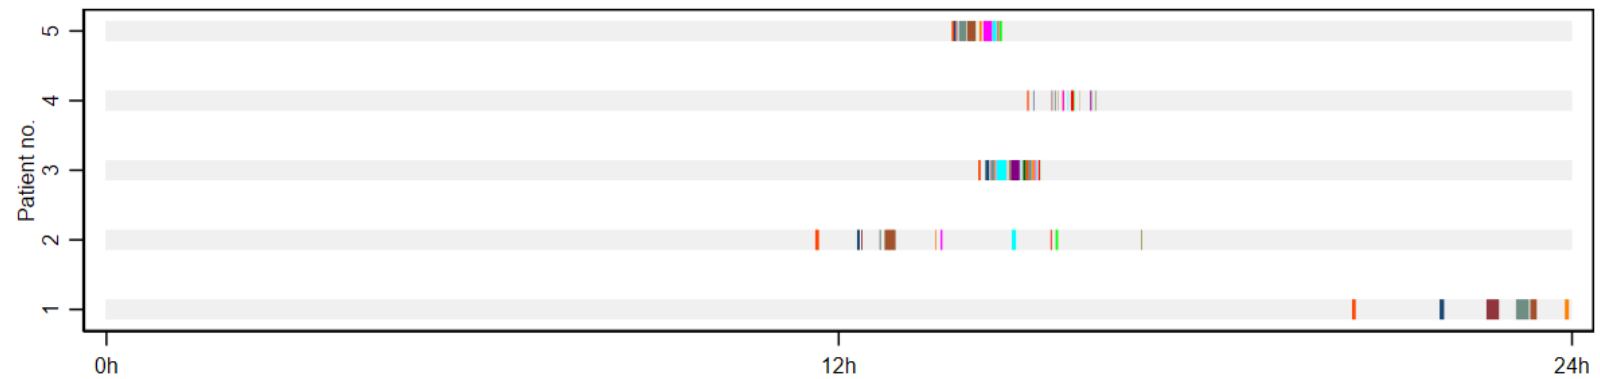

**Supplementary Figure S5.** Episode occurrence in patients with **AF progression** (n=54) according to progression status (n=54). Tachy- or bradyarrhythmia episodes were observed in 21 patients after ILR-detected progression to persistent- or permanent AF. BPM = Beats per minute. PM = pacemaker.

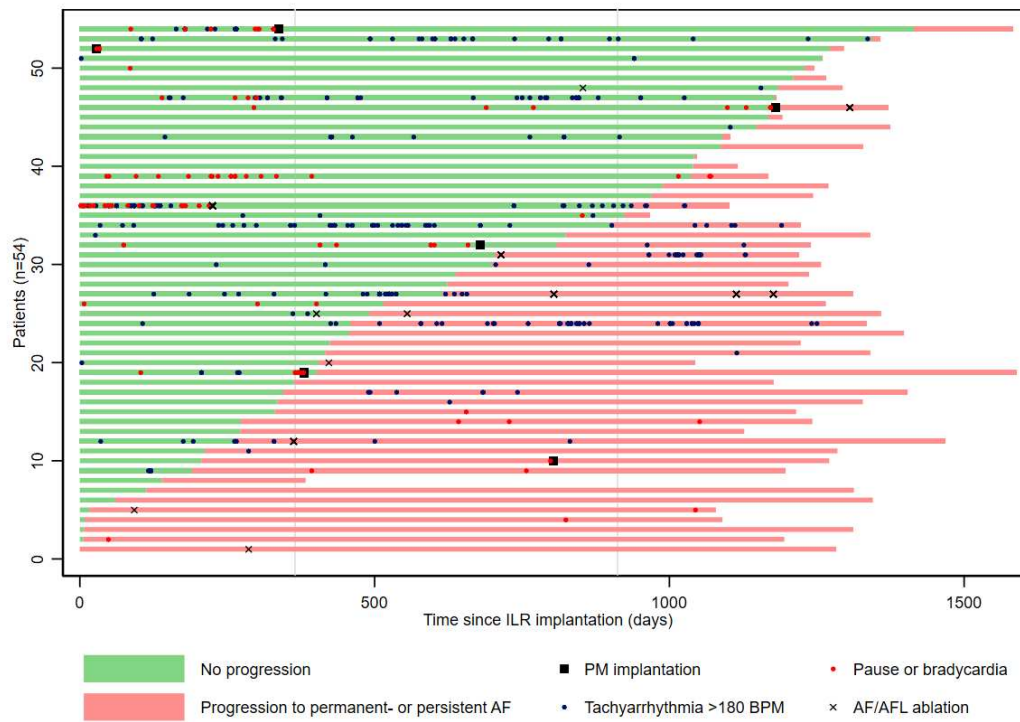

**Supplementary Figure S6.** Episode characteristics (n= 1,940 episodes in 175 patients). Spine plot showing the distribution of different alert types including aetiology of pauses based on single-lead ECG assessment.

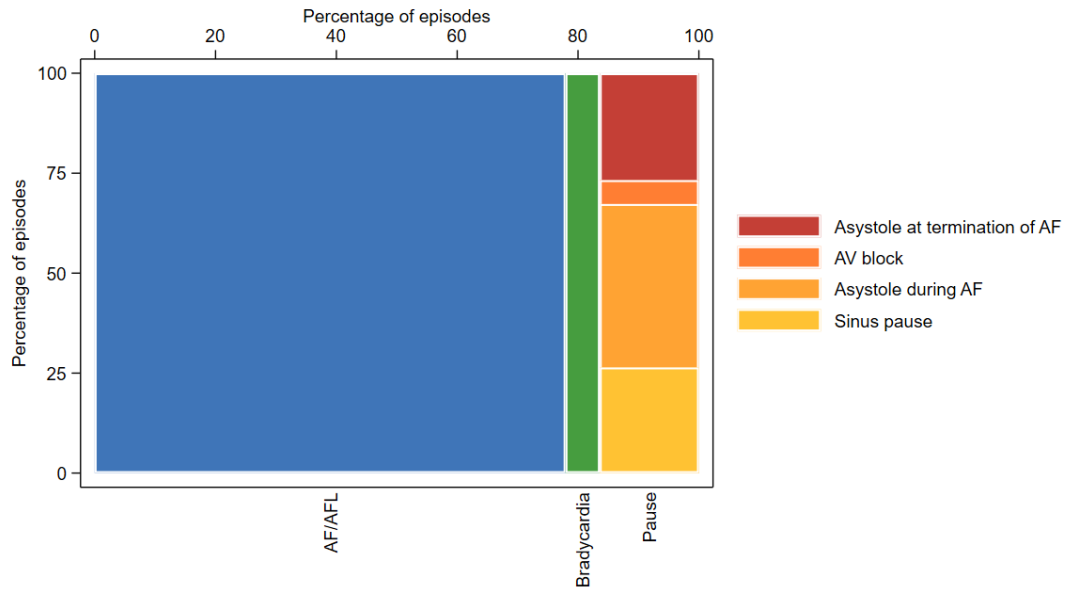

**Supplementary Figure S7.** Kaplan-Meier curves for time to first bradyarrhythmia event according to covariate levels.

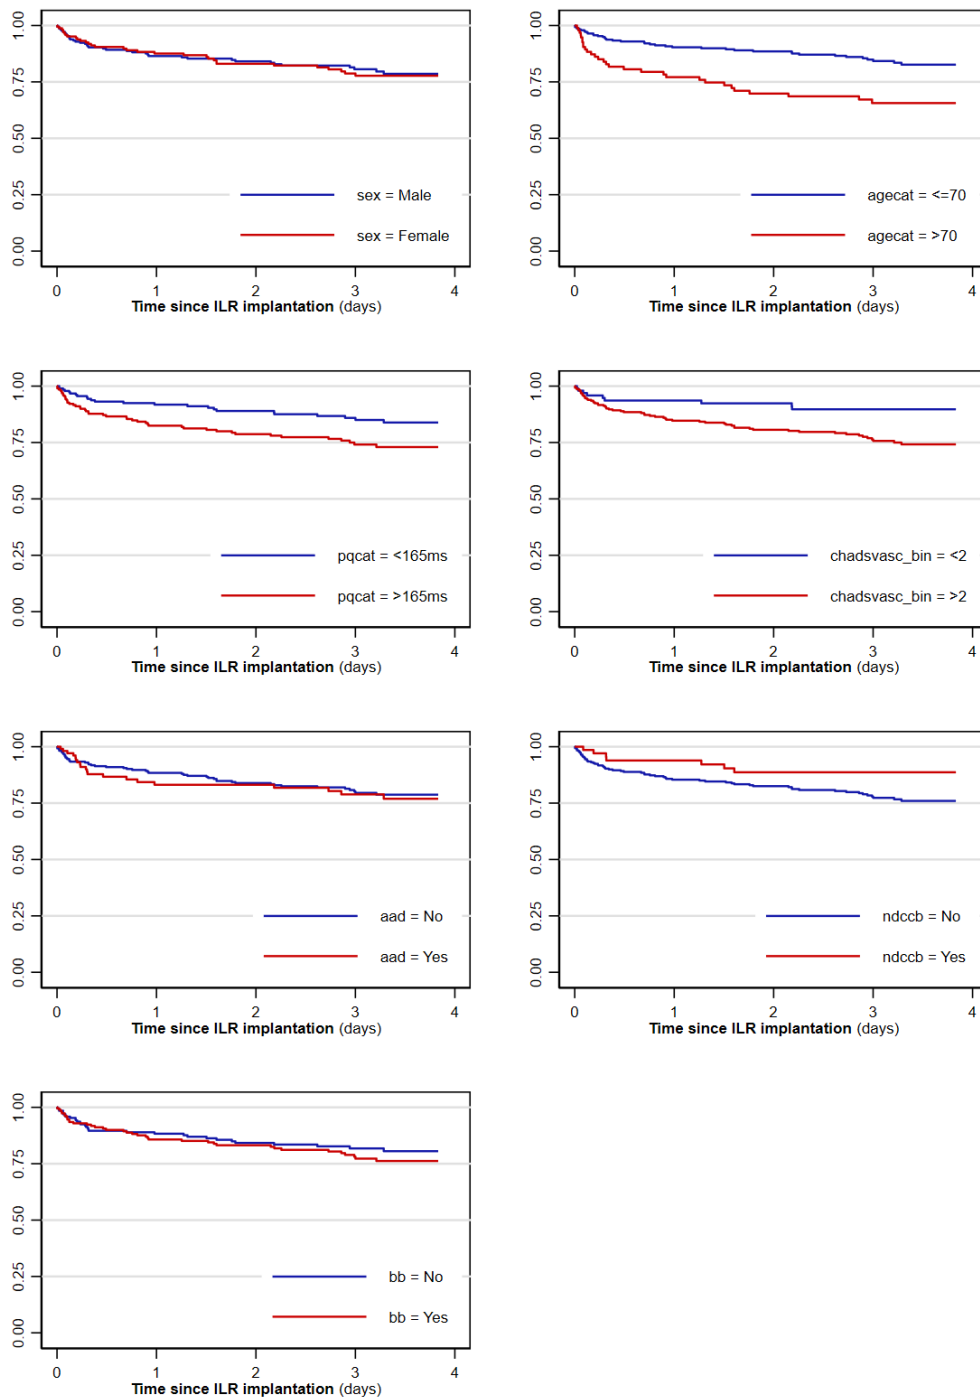

**Supplementary Figure S8.** Kaplan-Meier curves for time to first tachyarrhythmia event according to covariate levels.

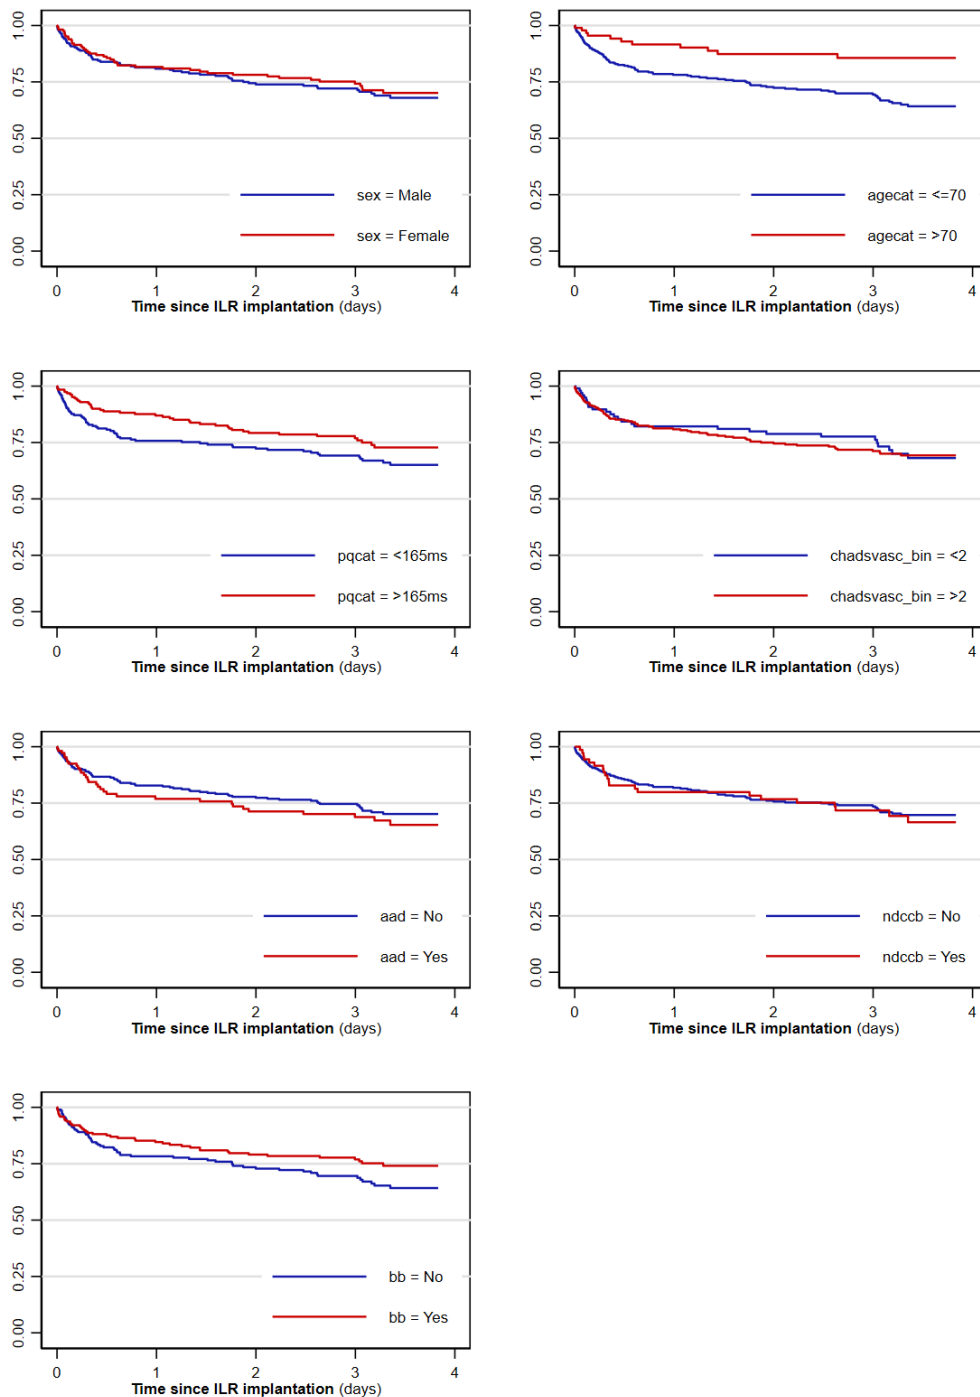

Supplement: inline-supplementary-material-1 [file inline-supplementary-material-1.pdf]
